# Supplementary material for: Patients with Very High Risk of Cardiovascular Adverse Events during Carfilzomib Therapy: Prevention and Management of Events in a Single Center Experience
Source: MDPI journal article supplement (doi:10.3390/cancers15041149), 2023-02-10
Supplement: s1 [file s1]

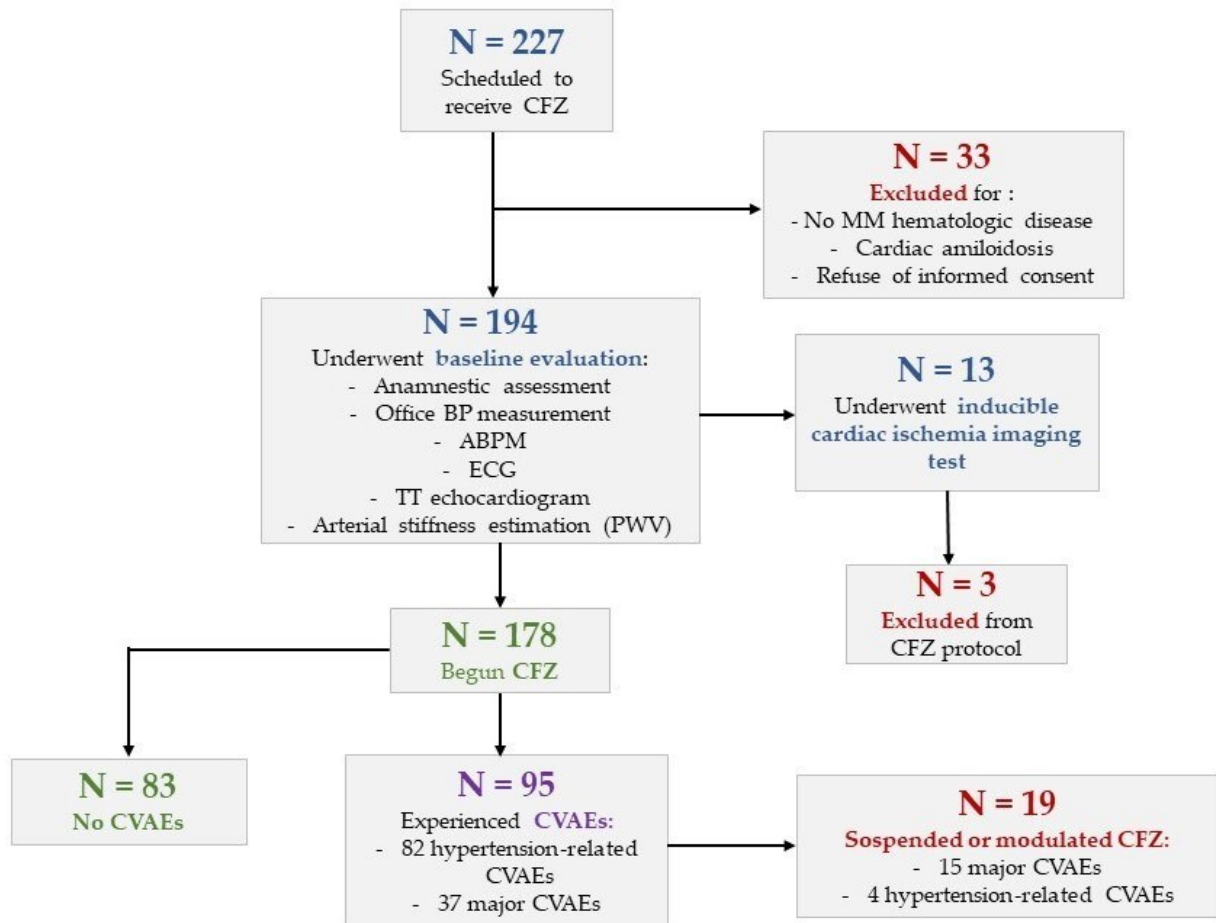

CFZ: Carfilzomib; MM: multiple myeloma; BP: blood pressure; ABPM: ambulatory blood pressure measurement; ECG: electrocardiogram; TT: transthoracic; PWV: pulse wave velocity; CVAEs: cardiovascular adverse events.

**Figure S1.** Flowchart of the study population.
